# Supplementary material
Source: PubMed Central journal article supplement (PMC2546508)
Supplement: NIHMS63176-supplement-1_si.pdf [file NIHMS63176-supplement-1_si.pdf]

The original Supporting Information, published February 10, 2006, was incorrect. The corrected version was posted March 10, 2006.

### Complete ref 26:

26. MacKerell, A. D.; Bashford, D.; Bellott, M.; Dunbrack, R. L.; Evanseck, J. D.; Field, M. J.; Fischer, S.; Gao, J.; Guo, H.; Ha, S.; Joseph-McCarthy, D.; Kuchnir, L.; Kuczera, K.; Lau, F. T. K.; Mattos, C.; Michnick, S.; Ngo, T.; Nguyen, D. T.; Prodhom, B.; Reiher, W. E.; Roux, B.; Schlenkrich, M.; Smith, J. C.; Stote, R.; Straub, J.; Watanabe, M.; Wiorkiewicz-Kuczera, J.; Yin, D.; Karplus, M. *J. Phys. Chem. B* **1998**, *102*, 3586-3616.

### CHARMM topology including Charges for ACh:

DEFA FIRS NTER LAST CTER  
AUTO ANGLES DIHE

```
RESI ACH          1.00 ! acetylcholine, D. Zhang
GROUP
ATOM  N1  NH1      0.131
ATOM  C1  CT3     -0.353 !
ATOM  H11 HA       0.186 !
ATOM  H12 HA       0.186 !
ATOM  H13 HA       0.186 !
ATOM  C2  CT3     -0.353 !
ATOM  H21 HA       0.186 !
ATOM  H22 HA       0.186 !
ATOM  H23 HA       0.186 !
ATOM  C3  CT3     -0.353 !
ATOM  H31 HA       0.186 !
ATOM  H32 HA       0.186 !
ATOM  H33 HA       0.186 !
ATOM  C4  CT2     -0.270 !
ATOM  H41 HA       0.172 !
ATOM  H42 HA       0.172 !
ATOM  C5  CT2      0.427 !
ATOM  H51 HA       0.014 !
ATOM  H52 HA       0.014 !
ATOM  O1  OS      -0.569 !
ATOM  C6  CC       0.937 !
ATOM  O2  O        -0.604 !
ATOM  C7  CT3     -0.525 !
ATOM  H71 HA       0.162 !
ATOM  H72 HA       0.162 !
ATOM  H73 HA       0.162 !
BOND  N1 C1      N1 C2      N1 C3      N1 C4
BOND  C1 H11     C1 H12     C1 H13
BOND  C2 H21     C2 H22     C2 H23
BOND  C3 H31     C3 H32     C3 H33
BOND  C4 H41     C4 H42     C4 C5
BOND  C5 H51     C5 H52     C5 O1
BOND  O1 C6      C6 C7
DOUBLE C6 O2
BOND  C7 H71     C7 H72     C7 H73
IMPR  C6 O1 O2 C7
ACCEPTOR O2 C6
PATC  FIRS NONE LAST NONE
```

## CHARMM parameters for ACh:

```
BONDS
!
!V(bond) = Kb(b - b0)**2
!
!Kb: kcal/mole/A**2
!b0: A
!
!atom type Kb          b0
OS  CT2  450.000      1.3300 ! ALLOW   ALC use OC-CT2
      ! ethoxide 6-31+G* geom/freq, adm jr., 6/1/92
OS  CC   525.000      1.2600 ! ALLOW   PEP POL ARO ION use OC-CC
      ! adm jr. 7/23/91, acetic acid

ANGLES
!
!V(angle) = Ktheta(Theta - Theta0)**2
!
!V(Urey-Bradley) = Kub(S - S0)**2
!
!Ktheta: kcal/mole/rad**2
!Theta0: degrees
!Kub: kcal/mole/A**2 (Urey-Bradley)
!S0: A
!
!atom types      Ktheta  Theta0  Kub      S0
CT2  NH1  CT3      50.000   109.5000 ! ALLOW   ALI PEP POL ARO
      ! NMA Vib Modes (LK)
CT3  NH1  CT3      50.000   109.5000 ! ALLOW   ALI PEP POL ARO
      ! NMA Vib Modes (LK)
CT2  CT2  OS       52.000   108.0000 ! ALLOW   ALI PEP POL ARO
      ! from CT2 CT1 C, for lactams, adm jr.
CT2  OS   CC       40.000   109.60   ! ALLOW   POL PEP
      ! adm jr. 5/02/91, acetic acid pure solvent
O    CC   OS       40.000   110.00   ! guess
CT3  CC   OS       40.000   110.00   ! guess --DZ

DIHEDRALS
!
!V(dihedral) = Kchi(1 + cos(n(chi) - delta))
!
!Kchi: kcal/mole
!n: multiplicity
!delta: degrees
!
!atom types      Kchi    n    delta
!
HA   CT3  NH1  CT3      0.0000  3     0.00 ! ALLOW PEP
      ! LK for autogenerate dihe, sp2-methyl, no dihedral
potential
HA   CT2  NH1  CT3      0.0000  3     0.00 ! ALLOW PEP
CT2  CT2  NH1  CT3      1.8000  1     0.00 ! ALLOW PEP
      ! ala dipeptide update for new C VDW Rmin, adm jr.,
3/3/93c
HA   CT3  NH1  CT2      0.0000  3     0.00
CT2  OS   CC   CT3      0.4000  1     0.00 ! ALLOW PEP PRO
CT2  OS   CC   O        0.4000  1     0.00 ! ALLOW PEP PRO
```
